# Supplementary material for: Improvement of Interlayer Adhesion and Heat Resistance of Biodegradable Ternary Blend Composite 3D Printing
Source: PubMed Central journal article supplement (PMC7957628; doi:10.3390/polym13050740), 2021-02-27
Supplement: polymers-13-00740-s001.pdf [file polymers-13-00740-s001.pdf]

# Improvement of Interlayer Adhesion and Heat Resistance of Biodegradable Ternary Blend Composites 3D Printing

Wattanachai Prasong <sup>1</sup>, Akira Ishigami <sup>1,2</sup>, Supaphorn Thumsorn <sup>2</sup>, Takashi Kurose <sup>2</sup> and Hiroshi Ito <sup>1,2,\*</sup>

<sup>1</sup> Graduate School of Organic Materials Science, Yamagata University, 4-3-16 Jonan, Yonezawa, Yamagata 992-8510, Japan; wattanachai.pra@gmail.com (W.P.); akira.ishigami@yz.yamagata-u.ac.jp (A.I.)

<sup>2</sup> Research Center for GREEN Materials and Advanced Processing (GMAP), 4-3-16 Jonan, Yonezawa, Yamagata 992-8510, Japan; thumsorn@yz.yamagata-u.ac.jp (S.T.); takashi.kurose@yz.yamagata-u.ac.jp (T.K.)

\* Correspondence: ihiroshi@yz.yamagata-u.ac.jp; Tel.: +81-238-26-3081

## Supplementary Data

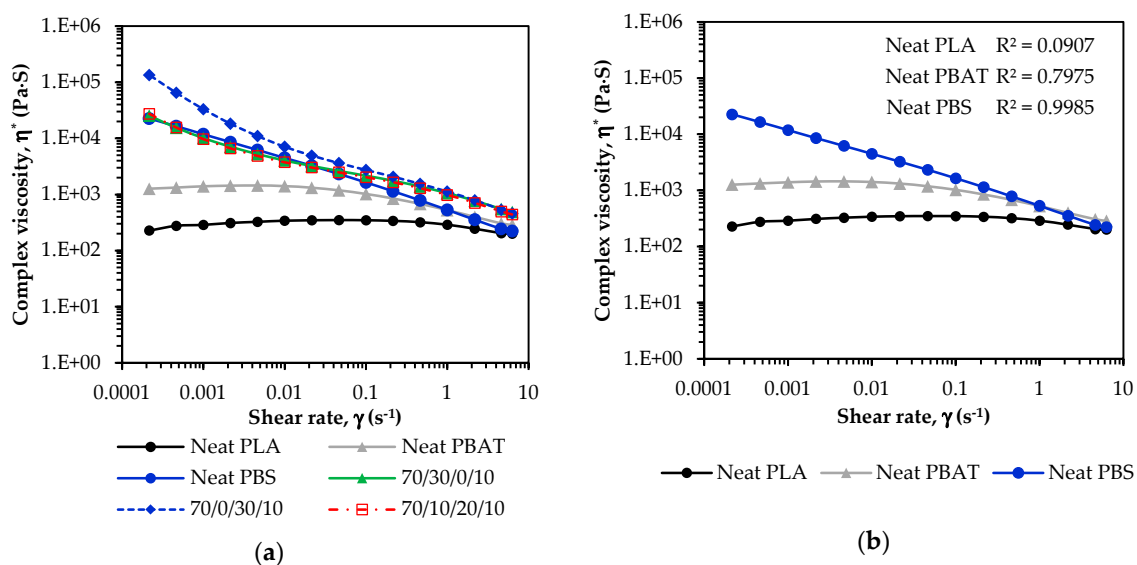

**Figure S1.** (a) Complex viscosity as a function of shear rate of neat polymers and PLA/PBAT/PB/nano talc composites at 210 °C; (b) Power regression of power law index for shear thinning behavior of neat polymers.

The power-law model for determining the shear thinning behavior [27, 36, 42].

$$\eta = K\dot{\gamma}^{n-1} \quad (S1)$$

Where  $\eta$  is the shear viscosity at shear rate of 0.2 s<sup>-1</sup>, K is the consistency index,  $\dot{\gamma}$  is the shear rate, and  $n$  is the power-law index.

**Table S1.** Determination of flow behavior of neat polymers and PLA/PBAT/PBS/nano talc composites.

| Polymer     | $\eta$ at $\dot{\gamma}$ 0.01 s <sup>-1</sup> (Pa·s) | $\eta$ at $\dot{\gamma}$ 0.2 s <sup>-1</sup> (Pa·s) | n <sup>1</sup> | K <sup>1</sup> (Pa·s) |
|-------------|------------------------------------------------------|-----------------------------------------------------|----------------|-----------------------|
| PLA         | 340                                                  | 339                                                 | 0.98           | 274                   |
| PBAT        | 1412                                                 | 847                                                 | 0.85           | 536                   |
| PBS         | 4482                                                 | 1143                                                | 0.55           | 535                   |
| 70/30/0/10  | 4032                                                 | 1753                                                | 0.65           | 953                   |
| 70/0/30/10  | 7075                                                 | 2069                                                | 0.49           | 983                   |
| 70/10/20/10 | 3758                                                 | 1648                                                | 0.64           | 873                   |

<sup>1</sup> Analyzes by power regression.

The estimation of blend composition in the vicinity of phase inversion [36, 42].

$$\frac{\eta_1}{\eta_2} = \frac{\varphi_1}{\varphi_2} \quad (S2)$$

Where  $\eta_1$  is the viscosity of polymer 1,  $\eta_2$  is the viscosity of polymer 2,  $\varphi_1$  is the volume fraction of polymer 1, and  $\varphi_2$  is the volume fraction of polymer 2. If the ratio of  $\frac{\eta_1}{\eta_2} > \frac{\varphi_1}{\varphi_2}$ , then polymer 2 will be the continuous phase [35].

**Table S2.** The ratio of viscosities and the volume fractions of polymers for predicting phase inversion in binary polymer blends.

| Binary Blends    |                                                       | Matrix | Dispersed phase | Phase inversion |
|------------------|-------------------------------------------------------|--------|-----------------|-----------------|
| PLA/PBAT (70/30) | $\frac{\eta_1}{\eta_2} < \frac{\varphi_1}{\varphi_2}$ | PLA    | PBAT            | PBAT > 71.5 %   |
| PLA/PBS (70/30)  | $\frac{\eta_1}{\eta_2} < \frac{\varphi_1}{\varphi_2}$ | PLA    | PBS             | PBS > 77.5 %    |
| PBAT/PBS (70/30) | $\frac{\eta_1}{\eta_2} < \frac{\varphi_1}{\varphi_2}$ | PBAT   | PBS             | PBS > 57.5 %    |
| PBS/PBAT (70/30) | $\frac{\eta_1}{\eta_2} < \frac{\varphi_1}{\varphi_2}$ | PBS    | PBAT            | PBS > 42.5 %    |

Remark: Shear viscosity of  $\eta_1$  and  $\eta_2$  at shear rate 0.2 s<sup>-1</sup> [23-24, 36].

The Harkin's spreading equation can be used to predict the type of wetting phenomenon in ternary blends [20, 23-24, 37-41].

$$\lambda_{ABC} \text{ or } \lambda_{BC} = \gamma_{AC} - \gamma_{AB} - \gamma_{BC} \quad (S3)$$

$$\lambda_{ACB} \text{ or } \lambda_{CB} = \gamma_{AB} - \gamma_{AC} - \gamma_{BC} \quad (S4)$$

$$\lambda_{BAC} \text{ or } \lambda_{AB} = \gamma_{BC} - \gamma_{AB} - \gamma_{AC} \quad (S5)$$

Where  $\lambda$  is the spreading coefficient,  $\gamma$  is the interfacial tensions for the polymer pairs and sub-indices refer to each phase in the mixture. A is PLA, B is PBAT and C is PBS.

Surface tension and interfacial tension from the harmonic mean equation for calculation of interfacial tension [23].

$$\gamma = \gamma_1 + \gamma_2 - \frac{4\gamma_1^d \gamma_2^d}{\gamma_1^d + \gamma_2^d} - \frac{4\gamma_1^p \gamma_2^p}{\gamma_1^p + \gamma_2^p} \quad (\text{S6})$$

Where  $\gamma$  is surface tension,  $\gamma^d$  is the dispersive contribution of surface tension, and  $\gamma^p$  is the polar contribution of surface tension.

**Table S3.** Surface tensions of PLA, PBAT and PBS and interfacial tensions of polymer blends [23].

| Polymer (Phase) | $\gamma$       | $\gamma^d$     | $\gamma^p$     | $\gamma$ of polymer blends | Interfacial tension (mN/m) |
|-----------------|----------------|----------------|----------------|----------------------------|----------------------------|
| PLA (A)         | $38.8 \pm 0.2$ | $30.3 \pm 0.2$ | 8.5            | $\gamma_{PLA/PBAT}$        | $0.08 \pm 0.01$            |
| PBAT (B)        | $41.4 \pm 0.3$ | $32.3 \pm 0.2$ | $9.1 \pm 0.1$  | $\gamma_{PLA/PBS}$         | $0.33 \pm 0.03$            |
| PBS (C)         | $43.6 \pm 0.4$ | $33.1 \pm 0.3$ | $10.5 \pm 0.1$ | $\gamma_{PBAT/PBS}$        | 0.11                       |

<sup>1</sup>  $\gamma$ ,  $\gamma^d$  and  $\gamma^p$  from the reference [23].

**Table S4.** The Harkin's spreading coefficient of ternary blend PLA/PBS/PBAT.

| $\lambda$                | Spreading coefficient (mN/m) |
|--------------------------|------------------------------|
| $\lambda_{PLA/PBAT/PBS}$ | $0.14 \pm 0.02$              |
| $\lambda_{PLA/PBS/PBAT}$ | $-0.36 \pm 0.02$             |
| $\lambda_{PBAT/PLA/PBS}$ | $-0.31 \pm 0.03$             |
